# Supplementary material
Source: PubMed Central journal article supplement (PMC7219676)
Supplement: S2513988617000025sup001.pdf [file S2513988617000025sup001.pdf]

**Supplementary Table 1.** Anatomical Localization of topologically connected clusters in each of the 15 Independent Component Analysis (ICA) components after thresholding at the 99<sup>th</sup> percentile. MAX: maximum value of dual regression coefficient within specific cluster. MNI: Montreal Neurological Institute. All coordinates are in mm. L, left hemisphere, R, right hemisphere.

| <b>ICA #1<br/>Occipito-Frontal Circuit</b> | N° of voxels | MAX  | MNI X | MNI Y | MNI Z |
|--------------------------------------------|--------------|------|-------|-------|-------|
| Visual cortex V2 BA18 R                    | 1326         | 62.2 | 14    | -92   | 30    |
| Caudate R                                  | 291          | 63.7 | 10    | 0     | 12    |
| Visual cortex V4 R                         | 239          | 42.4 | 24    | -74   | -16   |
| Visual cortex V3V L                        | 150          | 39.9 | -20   | -70   | -14   |
| Amygdala superficial group L               | 147          | 56.2 | -24   | 0     | -10   |
| Caudate L                                  | 145          | 62.4 | -8    | 2     | 8     |
| Amygdala superficial group R               | 67           | 57.3 | 24    | 2     | -10   |
| Para-Cingulate Gyrus                       | 55           | 29.6 | 0     | 32    | 32    |
| Inferior Frontal Gyrus BA44 R              | 39           | 30.7 | 52    | 10    | 26    |
| Brain stem                                 | 36           | 40.4 | 6     | -10   | -16   |
| Inferior Frontal Gyrus BA45 L              | 34           | 34.9 | -48   | 16    | -6    |
| Cerebellum L                               | 33           | 42.5 | -2    | -52   | -34   |
| Frontal operculum R                        | 21           | 35.5 | 50    | 18    | -6    |
| Putamen R                                  | 20           | 28   | 22    | 6     | 6     |
| Frontal Operculum L                        | 15           | 33   | -32   | 20    | 10    |
| Premotor cortex BA6 R                      | 15           | 28.3 | 2     | 18    | 50    |
| Lateral geniculate body L                  | 14           | 35.1 | -22   | -26   | -8    |
| Inferior Frontal Gyrus BA44 L              | 13           | 28.8 | -50   | 6     | 24    |
| Cerebellum R                               | 13           | 29.8 | 18    | -42   | -46   |
| Lateral Occipital Cortex L                 | 12           | 28.4 | -48   | -82   | 4     |

| <b>ICA #2<br/>Default Mode Network</b>  | N° of voxels | MAX  | MNI X | MNI Y | MNI Z |
|-----------------------------------------|--------------|------|-------|-------|-------|
| Frontal Pole / medial prefrontal cortex | 1285         | 73.4 | 0     | 62    | -6    |
| Posterior Cingulate Gyrus L             | 865          | 70.4 | -2    | -52   | 16    |
| Inferior parietal lobule L              | 472          | 73.5 | -46   | -68   | 44    |
| Frontal Pole R                          | 48           | 49.7 | 18    | 42    | 50    |
| Inferior parietal lobule R              | 47           | 46.2 | 54    | -64   | 36    |
| Subgenual Anterior Cingulate Cortex     | 26           | 74.4 | 0     | 6     | -12   |
| Inferior frontal gyrus BA45 L           | 18           | 44.7 | -40   | 30    | -14   |

| <b>ICA #3<br/>Extra-striate Visual Circuit</b> | N° of voxels | MAX  | MNI X | MNI Y | MNI Z |
|------------------------------------------------|--------------|------|-------|-------|-------|
| Occipital Gyrus L                              | 1424         | 65.7 | -26   | -86   | -20   |
| Occipital Gyrus R                              | 1382         | 65   | 26    | -94   | 0     |

| <b>ICA #4<br/>Occipito-Parietal Circuit</b> | N° of voxels | MAX  | MNI X | MNI Y | MNI Z |
|---------------------------------------------|--------------|------|-------|-------|-------|
| Inferior parietal lobule R                  | 1073         | 57.8 | 34    | -86   | 28    |
| Visual cortex V2 BA18 L                     | 772          | 57.1 | -26   | -88   | 26    |
| Visual cortex V2 BA18 R                     | 488          | 45   | 30    | -56   | -6    |
| Visual cortex V4 L                          | 457          | 39.9 | -28   | -64   | -6    |
| Premotor cortex R                           | 11           | 27.6 | 52    | 8     | 38    |

| <b>ICA #5<br/>Left Fronto-Parietal Circuit</b> | N° of voxels | MAX  | MNI X | MNI Y | MNI Z |
|------------------------------------------------|--------------|------|-------|-------|-------|
| Dorsolateral prefrontal cortex L               | 1619         | 79.7 | -52   | 14    | 32    |
| Inferior parietal lobule L                     | 605          | 48.2 | -40   | -56   | 56    |
| Medial Superior Frontal Gyrus L                | 172          | 55.5 | -2    | 26    | 46    |
| Inferior Frontal Gyrus BA45 R                  | 89           | 35.5 | 48    | 32    | 20    |
| Superior Frontal Gyrus L                       | 88           | 47.6 | -28   | 14    | 62    |
| Frontal Orbital Cortex L                       | 46           | 46   | -34   | 36    | -10   |
| Medial Frontal Pole R                          | 32           | 36.5 | 2     | 58    | 14    |
| Inferior Temporal Gyrus L                      | 30           | 34.2 | -54   | -44   | -12   |
| Middle Temporal Gyrus L                        | 23           | 29.5 | -62   | -54   | -8    |
| Inferior Frontal gyrus BA44 L                  | 18           | 30.1 | -38   | 22    | -2    |
| Cerebellum R                                   | 16           | 33   | 10    | -78   | -30   |
| Inferior Temporal Gyrus L                      | 16           | 29.3 | -50   | -60   | -20   |

| <b>ICA #6<br/>Right Fronto-Parietal Circuit</b> | N° of voxels | MAX  | MNI X | MNI Y | MNI Z |
|-------------------------------------------------|--------------|------|-------|-------|-------|
| Frontal Pole R                                  | 1939         | 63   | 42    | 56    | 0     |
| Inferior parietal lobule R                      | 701          | 47.7 | 42    | -62   | 52    |
| Cerebellum L                                    | 30           | 32.6 | -8    | -78   | -30   |
| Inferior Frontal Gyrus BA45 R                   | 30           | 30.1 | 56    | 22    | 4     |
| Cerebellum L                                    | 24           | 29.2 | -36   | -68   | -40   |
| Middle Temporal Gyrus R                         | 23           | 30.8 | 64    | -28   | -2    |
| Frontal Orbital Cortex L                        | 12           | 30.9 | -32   | 36    | -10   |

| <b>ICA #7<br/>"Salience" Network</b> | N° of voxels | MAX  | MNI X | MNI Y | MNI Z |
|--------------------------------------|--------------|------|-------|-------|-------|
| Supra-marginal Gyrus L               | 535          | 50   | -60   | -36   | 32    |
| Insula L                             | 474          | 67.1 | -40   | -12   | -8    |
| Inferior parietal lobule R           | 434          | 60.1 | 56    | -30   | 34    |
| Inferior Frontal Gyrus BA44 R        | 418          | 74.2 | 58    | 12    | 0     |
| Inferior Frontal Gyrus BA45 L        | 212          | 41   | -48   | 42    | 12    |
| Pre-motor cortex BA6 R               | 191          | 38.8 | 2     | 12    | 42    |
| Frontal Pole R                       | 129          | 43.6 | 50    | 44    | 4     |
| Superior parietal lobule R           | 101          | 48.1 | 16    | -34   | 42    |
| Insula R                             | 100          | 68.5 | 42    | -8    | -10   |
| Superior parietal lobule L           | 81           | 51.6 | -14   | -30   | 38    |
| Orbitofrontal cortex L               | 35           | 36.3 | -32   | 38    | -10   |
| Middle Temporal Gyrus L              | 33           | 32.3 | -60   | -62   | 0     |
| Anterior Cingulate Cortex L          | 18           | 30.8 | -10   | 8     | 38    |
| Pre-motor cortex BA6 L               | 17           | 28.4 | -2    | 6     | 66    |
| Amygdala L                           | <15          | 26.8 | -20   | 0     | -14   |
| Amygdala R                           | <15          | 25.9 | 22    | 2     | -14   |

| <b>ICA #8<br/>Striate Visual Circuit</b> | N° of voxels | MAX  | MNI X | MNI Y | MNI Z |
|------------------------------------------|--------------|------|-------|-------|-------|
| Intra-Calcarine Cortex R / L             | 2716         | 134  | 10    | -72   | 14    |
| Thalamus L                               | 20           | 60.8 | -12   | -32   | -4    |
| Thalamus L                               | 19           | 58   | -10   | -16   | 8     |
| Thalamus R                               | 17           | 60.4 | 14    | -30   | -4    |

| <b>ICA #9<br/>Hippocampal-Cerebellar Circuit</b>      | <b>N° of<br/>voxels</b> | <b>MAX</b> | <b>MNI<br/>X</b> | <b>MNI<br/>Y</b> | <b>MNI<br/>Z</b> |
|-------------------------------------------------------|-------------------------|------------|------------------|------------------|------------------|
| Cerebellum L                                          | 1439                    | 41.4       | -34              | -68              | -22              |
| Thalamus L                                            | 267                     | 49.7       | -10              | -4               | 14               |
| Hippocampus R                                         | 249                     | 31.9       | 26               | -20              | -16              |
| Hippocampus subiculum L                               | 221                     | 34.8       | -14              | -38              | 2                |
| Insula L                                              | 115                     | 30.3       | -40              | -20              | -2               |
| Secondary somatosensory cortex / Parietal operculum R | 111                     | 32.2       | 36               | -28              | 20               |
| Thalamus                                              | 42                      | 34.8       | 0                | -24              | -2               |
| Insula L                                              | 33                      | 24.8       | -30              | 22               | -6               |
| Cerebellum R                                          | 32                      | 35.7       | 30               | -40              | -40              |
| Insula R                                              | 30                      | 23         | 32               | 22               | -4               |
| Cerebellum L                                          | 25                      | 28.1       | -32              | -42              | -40              |
| Caudate L                                             | 22                      | 22.3       | -16              | 6                | 22               |
| Caudate R                                             | 19                      | 25.3       | 18               | 4                | 24               |
| Hippocampus subiculum R                               | 16                      | 23.2       | 12               | -30              | -2               |
| Cerebellum R                                          | 14                      | 28.6       | 16               | -44              | -46              |
| Brain-Stem                                            | 13                      | 26.1       | 0                | -34              | -8               |
| Cerebellum L                                          | 12                      | 29.6       | -12              | -46              | -44              |
| Frontal Operculum R                                   | 11                      | 21.3       | 50               | 18               | -6               |

| <b>ICA #10<br/>Para-hippocampal Circuit</b> | <b>N° of<br/>voxels</b> | <b>MAX</b> | <b>MNI<br/>X</b> | <b>MNI<br/>Y</b> | <b>MNI<br/>Z</b> |
|---------------------------------------------|-------------------------|------------|------------------|------------------|------------------|
| Posterior Cingulate Gyrus R                 | 608                     | 72.8       | 8                | -48              | 4                |
| Superior parietal lobule L                  | 510                     | 42.4       | -6               | -66              | 62               |
| Precuneus L                                 | 403                     | 69.1       | -16              | -58              | 18               |
| Middle Frontal Gyrus R                      | 319                     | 43.2       | 28               | 32               | 52               |
| Inferior parietal lobule L                  | 301                     | 55.2       | -34              | -84              | 38               |
| Inferior parietal lobule R                  | 253                     | 54         | 42               | -80              | 32               |
| Premotor cortex BA6 L                       | 127                     | 35.6       | -22              | 10               | 58               |
| Parahippocampal Gyrus L                     | 113                     | 54         | -32              | -40              | -12              |
| Parahippocampal Gyrus R                     | 92                      | 47.5       | 34               | -36              | -14              |
| Hippocampus subiculum R                     | 17                      | 37.2       | 22               | -20              | -16              |
| Cerebellum L                                | 16                      | 42.5       | -10              | -48              | -44              |
| Posterior Cingulate Cortex                  | 13                      | 32.7       | 0                | -24              | 28               |
| Cerebellum R                                | 12                      | 35.3       | 12               | -46              | -44              |

| <b>ICA #11<br/>Sensory-Motor Circuit</b>              | <b>N° of<br/>voxels</b> | <b>MAX</b> | <b>MNI<br/>X</b> | <b>MNI<br/>Y</b> | <b>MNI<br/>Z</b> |
|-------------------------------------------------------|-------------------------|------------|------------------|------------------|------------------|
| Primary somatosensory cortex BA2 L                    | 1353                    | 46.3       | -52              | -30              | 52               |
| Primary somatosensory cortex BA2 R                    | 769                     | 46.3       | 56               | -24              | 52               |
| Premotor cortex BA6 R                                 | 343                     | 36.4       | 40               | -22              | 66               |
| Premotor cortex BA6 L                                 | 91                      | 32.3       | -54              | 8                | 38               |
| Inferior Frontal Gyrus BA44 R                         | 37                      | 25.6       | 54               | 10               | 24               |
| Secondary somatosensory cortex / Parietal operculum L | 36                      | 24.7       | -50              | -20              | 20               |
| Medial Premotor cortex BA6                            | 28                      | 22.2       | 0                | -6               | 56               |
| Secondary somatosensory cortex / Parietal operculum L | 27                      | 38.5       | -38              | -4               | 16               |
| Superior parietal lobule R                            | 24                      | 22.3       | 18               | -70              | 54               |
| Secondary somatosensory cortex / Parietal operculum R | 20                      | 33.3       | 40               | -2               | 16               |
| Secondary somatosensory cortex / Parietal operculum R | 15                      | 21         | 52               | -16              | 18               |

|                            |    |      |     |     |    |
|----------------------------|----|------|-----|-----|----|
| Superior parietal lobule L | 14 | 20.5 | -16 | -72 | 54 |
|----------------------------|----|------|-----|-----|----|

| <b>ICA #12<br/>Fronto-Temporal Circuit</b> | N° of voxels | MAX  | MNI X | MNI Y | MNI Z |
|--------------------------------------------|--------------|------|-------|-------|-------|
| Broca's area BA45 L                        | 868          | 72.9 | -48   | 20    | -6    |
| Middle Temporal Gyrus L                    | 526          | 46   | -48   | -32   | -2    |
| Premotor cortex BA6 L                      | 468          | 44   | -4    | 24    | 64    |
| Middle Temporal Gyrus R                    | 392          | 50.1 | 48    | -22   | -8    |
| Broca's area BA45 R                        | 309          | 46.3 | 50    | 22    | -6    |
| Temporal Pole L                            | 85           | 32.9 | -48   | 2     | -24   |
| Premotor cortex BA6 L                      | 52           | 33.1 | -44   | 2     | 56    |
| Superior Frontal Gyrus L                   | 48           | 32.1 | -2    | 54    | 30    |
| Broca's area BA45 R                        | 33           | 31   | 54    | 22    | 28    |
| Inferior parietal lobule L                 | 15           | 29.5 | -42   | -54   | 22    |

| <b>ICA #13<br/>Sensory/Motor-Limbic Circuit</b>          | N° of voxels | MAX  | MNI X | MNI Y | MNI Z |
|----------------------------------------------------------|--------------|------|-------|-------|-------|
| Primary Somatosensory Cortex (BA3)                       | 1232         | 125  | 52    | -6    | 26    |
| Primary Somatosensory Cortex (BA3)                       | 1220         | 119  | -54   | -8    | 24    |
| Pre-motor Cortex (BA6)                                   | 138          | 39.1 | 2     | 2     | 64    |
| Secondary Somatosensory Cortex /Parietal Operculum (OP2) | 81           | 55.6 | -34   | -30   | 18    |
| Amygdala, superficial group                              | 30           | 57.9 | 26    | 0     | -10   |
| Amygdala, superficial group                              | 26           | 50.7 | -26   | -2    | -10   |
| Caudate Nucleus                                          | 25           | 51.5 | 10    | 0     | 12    |
| Caudate Nucleus                                          | 24           | 41.7 | -8    | 2     | 8     |
| Primary Motor Cortex (BA4)                               | 19           | 32.5 | 20    | -28   | 58    |
| Primary Motor Cortex (BA4)                               | 15           | 41   | -18   | -30   | 60    |

| <b>ICA #14<br/>Anterior Frontal Circuit</b> | N° of voxels | MAX  | MNI X | MNI Y | MNI Z |
|---------------------------------------------|--------------|------|-------|-------|-------|
| Middle Frontal Gyrus L                      | 1608         | 41   | -36   | 34    | 40    |
| Paracingulate Gyrus L                       | 425          | 39.2 | -2    | 28    | 42    |
| Frontal Pole R                              | 196          | 30.4 | 32    | 52    | 28    |
| Inferior parietal lobule L                  | 179          | 29.2 | -54   | -50   | 48    |
| Premotor cortex BA6 R                       | 85           | 27.7 | 18    | 12    | 68    |
| Inferior Frontal Gyrus BA45 R               | 75           | 24.4 | 54    | 24    | 28    |
| Frontal Pole R                              | 49           | 24.5 | 2     | 60    | -6    |
| Inferior Frontal Gyrus BA45 L               | 35           | 30.9 | -50   | 16    | -4    |
| Amygdala superficial group R                | 25           | 31   | 16    | -4    | -14   |
| Medial Precentral Gyrus                     | 21           | 24.8 | 0     | -34   | 48    |
| Amygdala superficial group L                | 14           | 26.8 | -16   | -2    | -16   |
| Frontal Pole L                              | 14           | 26.4 | -30   | 50    | -12   |
| Subgenual Anterior Cingulate Cortex         | 11           | 28.7 | 0     | 6     | -12   |

| <b>ICA #15<br/>Cingulate Cortex Circuit</b> | N° of voxels | MAX  | MNI X | MNI Y | MNI Z |
|---------------------------------------------|--------------|------|-------|-------|-------|
| Posterior Cingulate Gyrus                   | 2353         | 114  | 0     | -30   | 26    |
| Paracingulate Gyrus R                       | 138          | 32.4 | 2     | 24    | 36    |
| Posterior Cingulate Gyrus L                 | 110          | 38.5 | -14   | -46   | 34    |

|                                  |    |      |     |     |     |
|----------------------------------|----|------|-----|-----|-----|
| Frontal Operculum R              | 56 | 37.8 | 58  | 12  | -2  |
| Anterior intra-parietal sulcus L | 34 | 27.6 | -34 | -58 | 40  |
| Frontal Operculum L              | 26 | 32.1 | -58 | 8   | 0   |
| Medial Precentral Gyrus          | 21 | 30.8 | 0   | -34 | 48  |
| Insula R                         | 12 | 28.8 | 42  | -8  | -10 |
| Paracingulate Gyrus L            | 12 | 27.1 | -10 | 26  | 28  |
